# Supplementary material for: Rapid capillary electrochromatographic profiling of phytohormones on a hydrophilic interaction/strong anion-exchange mixed-mode monolith
Source: Royal Society of Chemistry journal article supplement (doi:10.1039/c2an36354b), 2012-11-01
Supplement: c2an36354b.pdf [file c2an36354b.pdf]

## Electronic Supporting Information

### **Rapid capillary electrochromatographic profiling of phytohormones on a hydrophilic interaction / strong anion-exchange mixed-mode monolith**

Xucong Lin\*<sup>a</sup>, Yanping Li<sup>a</sup>, Dongjie Xu<sup>a</sup>, Chunmei Yang<sup>a</sup>, Zenghong Xie\*<sup>ab</sup>

<sup>a</sup> *Institute of food safety and environmental monitoring, Fuzhou University, 350108, China. Fax: +86-591-22866131; Tel: +86-591-22866131; E-mail: xulin@fzu.edu.cn*

<sup>b</sup> *Xiamen Huaxia Vocational College, Xiamen, 361024, China. Fax: +86-591-22866131; Tel: +86-591-22866131 E-mail: zhxie@fzu.edu.cn*

## Experimental:

### Calculations

The permeability  $k$  value is calculated by the formula (1) [S1]:

$$k = \eta Lu / \Delta P \quad (1)$$

Where  $u$  is the linear velocity of the eluent,  $\eta$  is the dynamic viscosity of the mobile phase,  $L$  is the column length, and  $\Delta P$  is the pressure drop across the column.

The swelling propensity (SP) factor is calculated by the formula (2) [S2]:

$$SP = (p(\text{ACN}) - p(\text{H}_2\text{O})) / p(\text{H}_2\text{O}) \quad (2)$$

Where  $p$  is the pressure relative to the viscosity,  $p = P/\eta$ . In the way chosen above a non-swelling material will have an SP value of 0.

The retention factor  $k^*$  for neutral compounds was calculated as Eq.(3), and peak locator for chromatography  $K_{cc}$  of charged analytes can be expressed in a manner similar to Eq.(4) as follows [S3]:

$$k^* = (t_m - t_0) / t_0 \quad (3)$$

$$K_{cc} = (t_m - t_0) / t_0 \quad (4)$$

$t_m$  and  $t_0$  are the migration time of the analyte and an unretained tracer, respectively.

### References:

S1 P.A. Bristow and J.H. Knox, *Chromatographia*, 1977, **10**: 279

S2 F. Nevejans and M. Verzele, *J. Chromatogr.*, 1985, **350**:145

S3 Anurag S. Rathore and Csaba Horváth, *Electrophoresis*, 2002, **23**, 1211

## Results and discussions

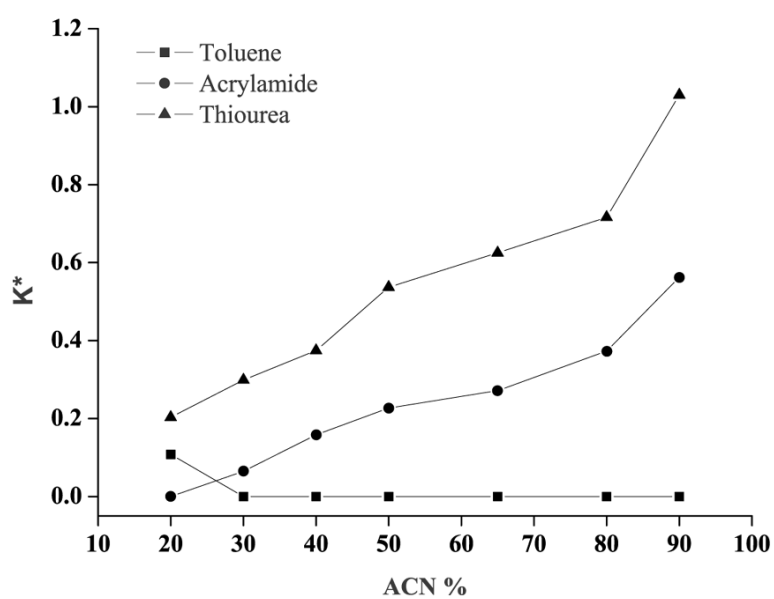

**Fig.S1** Retention factor on poly(META-co-PETA) monolithic column

Column H, 30 cm effective length, 50 cm total length 100 mm id; mobile phase, 5mM ammonium formate buffer, pH 3.0, in ACN/H<sub>2</sub>O; Back pressure 250 psi; applied voltage: +10 kV; pump flow: 0.1 ml/min.

**Table S1. Effect of pump flow rate on migration time and the response of tested phytohormones<sup>a</sup>**

|                 | 0.15 mL/min |          | 0.10 mL/min |          | 0.05 mL/min |          |
|-----------------|-------------|----------|-------------|----------|-------------|----------|
|                 | Migration   | Response | Migration   | Response | Migration   | Response |
|                 | time (min)  | (mV)     | time (min)  | (mV)     | time (min)  | (mV)     |
| ABA             | 1.39        | 0.89     | 1.38        | 1.12     | 1.41        | 1.73     |
| IAA             | 1.97        | 1.47     | 1.90        | 2.19     | 2.02        | 2.61     |
| GA <sub>3</sub> | 3.27        | 1.41     | 3.23        | 1.93     | 3.34        | 3.19     |

<sup>a</sup> Monolithic column: effective length of 30 cm × 100 i.d., total length of 50 cm; mobile phase: ACN/ ammonium formate buffer (30 mM, pH 3.0)=80:20 (v/v); Pump flow rate changed from 0.05 to 0.15 mL/min; other conditions were same as the Fig.3
